# Supplementary material
Source: PubMed Central journal article supplement (PMC6497539)
Supplement: NIHMS1518801-supplement-4.pdf [file NIHMS1518801-supplement-4.pdf]

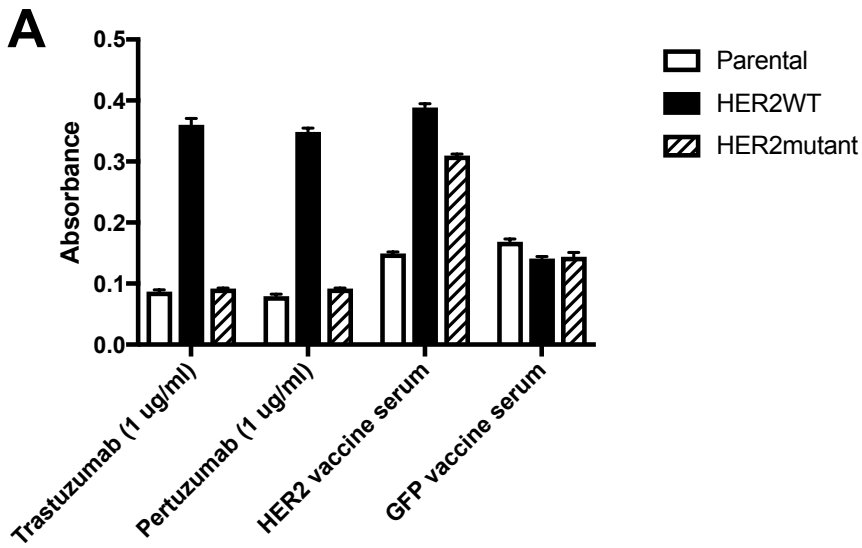

**Supplemental Figure 2. Mutation of HER2 to obscure binding of Trastuzumab and Pertuzumab. A.)** EPH4 cells were stably transfected with wild type HER2 or a form of HER2 with 7 point mutations within the Trastuzumab/Pertuzumab binding site. Parental EPH4 cells do not express HER2 and serve as a negative control. Antibodies or serum from HER2 vaccinated (positive control) or GFP vaccinated (negative control) mice were used for the cell based ELISA.
