# Supplementary material
Source: PubMed Central journal article supplement (PMC6497539)
Supplement: NIHMS1518801-supplement-5.pdf [file NIHMS1518801-supplement-5.pdf]

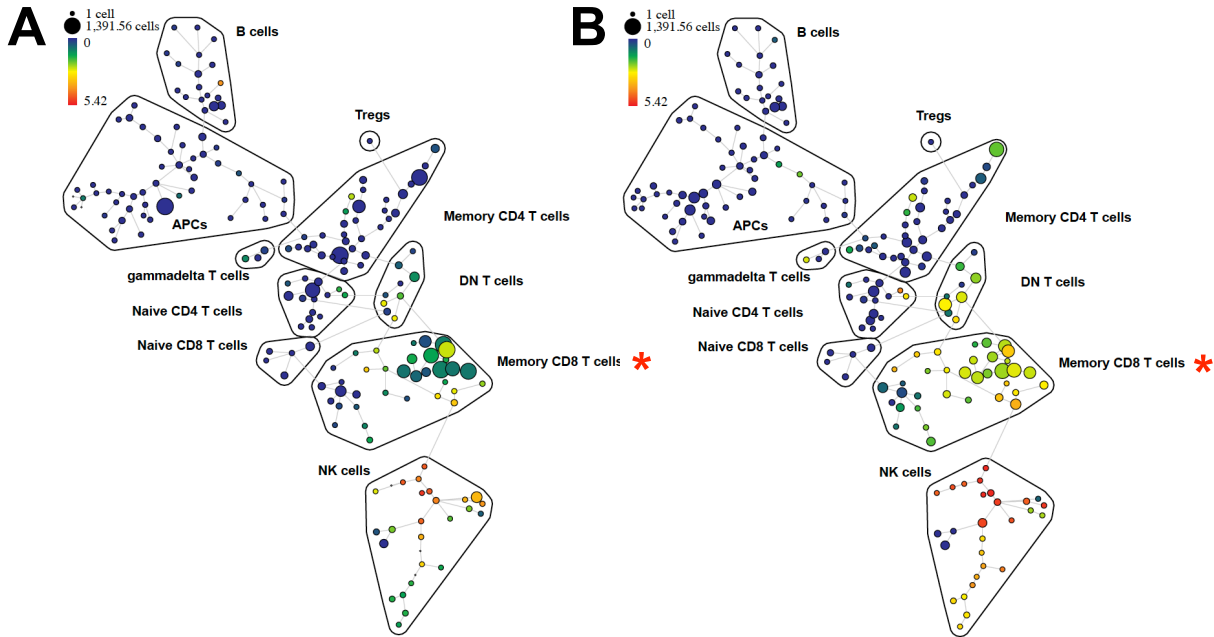

**Supplementary figure 3. SPADe tree generated by CYTOF analysis.** An representative SPADe tree was generated from patient 015. Cells were pre-gated on live, intact singlets. The tree is colored by intensity of perforin expression. Samples restimulated with HER2 peptide pool pre-vaccination (A) and post-vaccination (B) are shown. Memory CD8 T cell cluster that was identified as having significantly changed is indicated by the \*
