# Supplementary material
Source: PubMed Central journal article supplement (PMC6497539)
Supplement: NIHMS1518801-supplement-6.pdf [file NIHMS1518801-supplement-6.pdf]

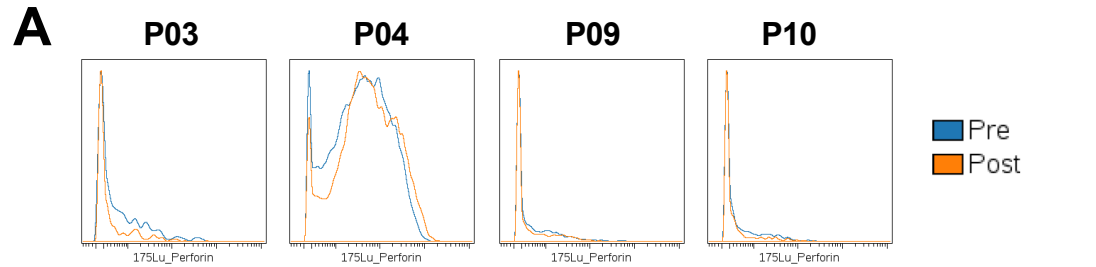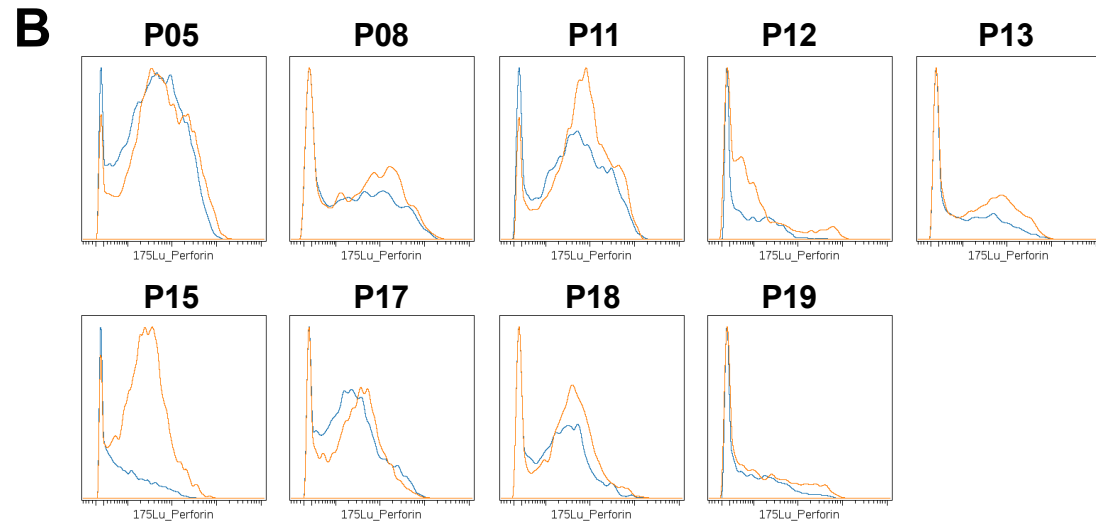

**Supplementary figure 4. Individual histograms of perforin expression by Memory CD8 T cell cluster pre- and post-vaccination.** Cells were pregated on live, intact singlets. (A) Patients with a decrease in median perforin expression following vaccination. (B) Patients with an increase in median perforin expression following vaccination. Pre-vaccination shown in blue; post-vaccination shown in orange.
