# Supplementary material
Source: PubMed Central journal article supplement (PMC6497539)

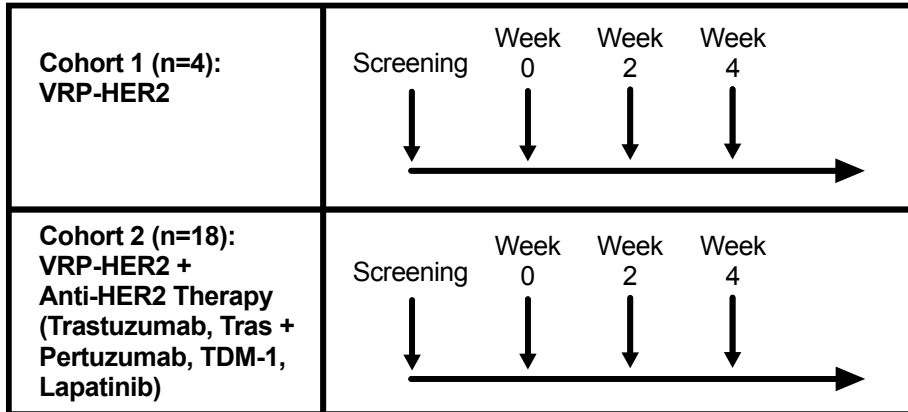

**Supplemental Figure 1. Patient cohort schematic.**

Supplement: NIHMS1518801-supplement-3.pdf [file NIHMS1518801-supplement-3.pdf]
